# Supplementary material for: Aurophilic Interactions of Dimeric Bisphosphine Gold(I) Complexes Pre-Organized by the Structure of the 1,5-Diaza-3,7-Diphosphacyclooctanes
Source: MDPI journal article supplement (doi:10.3390/inorganics10120224), 2022-11-25

## checkCIF/PLATON report

You have not supplied any structure factors. As a result the full set of tests cannot be run.

THIS REPORT IS FOR GUIDANCE ONLY. IF USED AS PART OF A REVIEW PROCEDURE FOR PUBLICATION, IT SHOULD NOT REPLACE THE EXPERTISE OF AN EXPERIENCED CRYSTALLOGRAPHIC REFEREE.

No syntax errors found.      CIF dictionary      Interpreting this report

### Datablock: shelx

---

|                 |                                                   |                                       |
|-----------------|---------------------------------------------------|---------------------------------------|
| Bond precision: | C-C = 0.0212 A                                    | Wavelength=0.71073                    |
| Cell:           | a=20.3117(19)                                     | b=21.479(2)      c=23.204(2)          |
|                 | alpha=109.568(3)                                  | beta=105.798(3)      gamma=103.892(3) |
| Temperature:    | 110 K                                             |                                       |
|                 | Calculated                                        | Reported                              |
| Volume          | 8543.7(14)                                        | 8543.9(14)                            |
| Space group     | P -1                                              | P -1                                  |
| Hall group      | -P 1                                              | -P 1                                  |
| Moiety formula  | C88 H92 Au2 N8 P4, C H2<br>Cl2, 2(Cl) [+ solvent] | C88 H92 Au2 N8 P4, C H2<br>Cl2, 2(Cl) |
| Sum formula     | C89 H94 Au2 Cl4 N8 P4 [+<br>solvent]              | C89 H94 Au2 Cl4 N8 P4                 |
| Mr              | 1935.35                                           | 1935.33                               |
| Dx, g cm-3      | 1.505                                             | 1.505                                 |
| Z               | 4                                                 | 4                                     |
| Mu (mm-1)       | 3.679                                             | 3.679                                 |
| F000            | 3880.0                                            | 3880.0                                |
| F000'           | 3869.18                                           |                                       |
| h, k, lmax      | 25, 26, 29                                        | 25, 26, 29                            |
| Nref            | 35465                                             | 35148                                 |
| Tmin, Tmax      | 0.699, 0.929                                      | 0.579, 0.745                          |
| Tmin'           | 0.685                                             |                                       |

Correction method= # Reported T Limits: Tmin=0.579 Tmax=0.745

AbsCorr = MULTII-SCAN

Data completeness= 0.991

Theta(max)= 26.513

R(reflections)= 0.0677( 23952)

wR2(reflections)=  
0.1766( 35148)

S = 1.065

Npar= 1829

The following ALERTS were generated. Each ALERT has the format

**test-name\_ALERT\_alert-type\_alert-level.**

Click on the hyperlinks for more details of the test.

---

### Alert level B

|                   |                                 |                       |       |         |        |
|-------------------|---------------------------------|-----------------------|-------|---------|--------|
| PLAT213_ALERT_2_B | Atom C12C                       | has ADP max/min Ratio | ..... | 4.5     | prolat |
| PLAT234_ALERT_4_B | Large Hirshfeld Difference C27D | --C28D                | .     | 0.28    | Ang.   |
| PLAT342_ALERT_3_B | Low Bond Precision on C-C Bonds | .....                 |       | 0.02123 | Ang.   |
| PLAT410_ALERT_2_B | Short Intra H...H Contact H44G  | ..H50D                | .     | 1.88    | Ang.   |
|                   |                                 | x,y,z =               |       | 1_555   | Check  |

---

### Alert level C

ABSTY02\_ALERT\_1\_C An \_exptl\_absorpt\_correction\_type has been given without  
a literature citation. This should be contained in the  
\_exptl\_absorpt\_process\_details field.

Absorption correction given as multi-scan

RINTA01\_ALERT\_3\_C The value of Rint is greater than 0.12

Rint given 0.123

|                   |                                                |                             |       |      |        |
|-------------------|------------------------------------------------|-----------------------------|-------|------|--------|
| PLAT213_ALERT_2_C | Atom N46F                                      | has ADP max/min Ratio       | ..... | 3.9  | prolat |
| PLAT213_ALERT_2_C | Atom C45F                                      | has ADP max/min Ratio       | ..... | 3.9  | prolat |
| PLAT213_ALERT_2_C | Atom C47F                                      | has ADP max/min Ratio       | ..... | 3.9  | prolat |
| PLAT213_ALERT_2_C | Atom C48F                                      | has ADP max/min Ratio       | ..... | 3.9  | prolat |
| PLAT213_ALERT_2_C | Atom C49F                                      | has ADP max/min Ratio       | ..... | 3.9  | prolat |
| PLAT213_ALERT_2_C | Atom C50F                                      | has ADP max/min Ratio       | ..... | 3.9  | prolat |
| PLAT213_ALERT_2_C | Atom C28C                                      | has ADP max/min Ratio       | ..... | 3.5  | prolat |
| PLAT220_ALERT_2_C | NonSolvent Resd 1                              | C Ueq(max)/Ueq(min) Range   |       | 4.2  | Ratio  |
| PLAT220_ALERT_2_C | NonSolvent Resd 1                              | N Ueq(max)/Ueq(min) Range   |       | 4.4  | Ratio  |
| PLAT220_ALERT_2_C | NonSolvent Resd 2                              | C Ueq(max)/Ueq(min) Range   |       | 4.8  | Ratio  |
| PLAT220_ALERT_2_C | NonSolvent Resd 2                              | N Ueq(max)/Ueq(min) Range   |       | 3.3  | Ratio  |
| PLAT222_ALERT_3_C | NonSolvent Resd 1                              | H Uiso(max)/Uiso(min) Range |       | 4.3  | Ratio  |
| PLAT222_ALERT_3_C | NonSolvent Resd 2                              | H Uiso(max)/Uiso(min) Range |       | 4.9  | Ratio  |
| PLAT234_ALERT_4_C | Large Hirshfeld Difference N1                  | --C8                        | .     | 0.16 | Ang.   |
| PLAT234_ALERT_4_C | Large Hirshfeld Difference N25B                | --C24B                      | .     | 0.20 | Ang.   |
| PLAT234_ALERT_4_C | Large Hirshfeld Difference C44                 | --C45                       | .     | 0.16 | Ang.   |
| PLAT234_ALERT_4_C | Large Hirshfeld Difference N25D                | --C24D                      | .     | 0.19 | Ang.   |
| PLAT234_ALERT_4_C | Large Hirshfeld Difference C13D                | --C14D                      | .     | 0.18 | Ang.   |
| PLAT234_ALERT_4_C | Large Hirshfeld Difference C39C                | --C40C                      | .     | 0.16 | Ang.   |
| PLAT234_ALERT_4_C | Large Hirshfeld Difference C43D                | --C44D                      | .     | 0.18 | Ang.   |
| PLAT241_ALERT_2_C | High 'MainMol' Ueq as Compared to Neighbors of | N25B                        | Check |      |        |
| PLAT241_ALERT_2_C | High 'MainMol' Ueq as Compared to Neighbors of | C23B                        | Check |      |        |
| PLAT241_ALERT_2_C | High 'MainMol' Ueq as Compared to Neighbors of | C28B                        | Check |      |        |
| PLAT241_ALERT_2_C | High 'MainMol' Ueq as Compared to Neighbors of | C31B                        | Check |      |        |
| PLAT241_ALERT_2_C | High 'MainMol' Ueq as Compared to Neighbors of | N25D                        | Check |      |        |
| PLAT241_ALERT_2_C | High 'MainMol' Ueq as Compared to Neighbors of | C11C                        | Check |      |        |
| PLAT241_ALERT_2_C | High 'MainMol' Ueq as Compared to Neighbors of | C12C                        | Check |      |        |
| PLAT241_ALERT_2_C | High 'MainMol' Ueq as Compared to Neighbors of | C14D                        | Check |      |        |
| PLAT241_ALERT_2_C | High 'MainMol' Ueq as Compared to Neighbors of | C26C                        | Check |      |        |
| PLAT241_ALERT_2_C | High 'MainMol' Ueq as Compared to Neighbors of | C28D                        | Check |      |        |
| PLAT241_ALERT_2_C | High 'MainMol' Ueq as Compared to Neighbors of | C44D                        | Check |      |        |

|                   |       |             |                                 |       |       |
|-------------------|-------|-------------|---------------------------------|-------|-------|
| PLAT242_ALERT_2_C | Low   | 'MainMol'   | Ueq as Compared to Neighbors of | C24B  | Check |
| PLAT242_ALERT_2_C | Low   | 'MainMol'   | Ueq as Compared to Neighbors of | C26B  | Check |
| PLAT242_ALERT_2_C | Low   | 'MainMol'   | Ueq as Compared to Neighbors of | C10C  | Check |
| PLAT242_ALERT_2_C | Low   | 'MainMol'   | Ueq as Compared to Neighbors of | C14C  | Check |
| PLAT242_ALERT_2_C | Low   | 'MainMol'   | Ueq as Compared to Neighbors of | C24C  | Check |
| PLAT242_ALERT_2_C | Low   | 'MainMol'   | Ueq as Compared to Neighbors of | C29D  | Check |
| PLAT244_ALERT_4_C | Low   | 'Solvent'   | Ueq as Compared to Neighbors of | C100  | Check |
| PLAT260_ALERT_2_C | Large | Average     | Ueq of Residue Including C111   | 0.109 | Check |
| PLAT331_ALERT_2_C | Small | Aver        | Phenyl C-C Dist C10C --C15C .   | 1.36  | Ang.  |
| PLAT411_ALERT_2_C | Short | Inter H...H | Contact H11C ..H36B .           | 2.01  | Ang.  |
|                   |       |             | x,y,z =                         | 1_555 | Check |

### ● Alert level G

|                   |                                                  |        |        |
|-------------------|--------------------------------------------------|--------|--------|
| PLAT002_ALERT_2_G | Number of Distance or Angle Restraints on AtSite | 7      | Note   |
| PLAT020_ALERT_3_G | The Value of Rint is Greater Than 0.12 .....     | 0.123  | Report |
| PLAT083_ALERT_2_G | SHELXL Second Parameter in WGHT Unusually Large  | 119.24 | Why ?  |
| PLAT154_ALERT_1_G | The s.u.'s on the Cell Angles are Equal ..(Note) | 0.003  | Degree |
| PLAT171_ALERT_4_G | The CIF-Embedded .res File Contains EADP Records | 8      | Report |
| PLAT172_ALERT_4_G | The CIF-Embedded .res File Contains DFIX Records | 4      | Report |
| PLAT174_ALERT_4_G | The CIF-Embedded .res File Contains FLAT Records | 3      | Report |
| PLAT301_ALERT_3_G | Main Residue Disorder .....(Resd 1 )             | 16%    | Note   |
| PLAT410_ALERT_2_G | Short Intra H...H Contact H8A ..H44A .           | 2.01   | Ang.   |
|                   | x,y,z =                                          | 1_555  | Check  |
| PLAT410_ALERT_2_G | Short Intra H...H Contact H8B1 ..H44C .          | 2.07   | Ang.   |
|                   | x,y,z =                                          | 1_555  | Check  |
| PLAT411_ALERT_2_G | Short Inter H...H Contact H14D ..H50E .          | 2.12   | Ang.   |
|                   | 2-x,1-y,1-z =                                    | 2_766  | Check  |
| PLAT411_ALERT_2_G | Short Inter H...H Contact H40D ..H47E .          | 2.07   | Ang.   |
|                   | 1-x,1-y,1-z =                                    | 2_666  | Check  |
| PLAT432_ALERT_2_G | Short Inter X...Y Contact C114 ..C48B .          | 3.24   | Ang.   |
|                   | 1-x,1-y,1-z =                                    | 2_666  | Check  |
| PLAT605_ALERT_4_G | Largest Solvent Accessible VOID in the Structure | 171    | A**3   |
| PLAT720_ALERT_4_G | Number of Unusual/Non-Standard Labels .....      | 24     | Note   |
| PLAT722_ALERT_1_G | Angle Calc 122.00, Rep 123.40 Dev...             | 1.40   | Degree |
|                   | C50E -C49E -H49E 1_555 1_555 1_555 #             | 647    | Check  |
| PLAT793_ALERT_4_G | Model has Chirality at C9C (Centro SPGR)         | R      | Verify |
| PLAT860_ALERT_3_G | Number of Least-Squares Restraints .....         | 13     | Note   |
| PLAT869_ALERT_4_G | ALERTS Related to the Use of SQUEEZE Suppressed  | !      | Info   |
| PLAT883_ALERT_1_G | No Info/Value for _atom_sites_solution_primary . | Please | Do !   |
| PLAT933_ALERT_2_G | Number of HKL-OMIT Records in Embedded .res File | 62     | Note   |
| PLAT965_ALERT_2_G | The SHELXL WEIGHT Optimisation has not Converged | Please | Check  |
| PLAT967_ALERT_5_G | Note: Two-Theta Cutoff Value in Embedded .res .. | 60.0   | Degree |

0 **ALERT level A** = Most likely a serious problem - resolve or explain  
4 **ALERT level B** = A potentially serious problem, consider carefully  
43 **ALERT level C** = Check. Ensure it is not caused by an omission or oversight  
23 **ALERT level G** = General information/check it is not something unexpected

4 ALERT type 1 CIF construction/syntax error, inconsistent or missing data  
42 ALERT type 2 Indicator that the structure model may be wrong or deficient  
7 ALERT type 3 Indicator that the structure quality may be low  
16 ALERT type 4 Improvement, methodology, query or suggestion  
1 ALERT type 5 Informative message, check

## Validation response form

Please find below a validation response form (VRF) that can be filled in and pasted into your CIF.

```
# start Validation Reply Form
_vrf_PLAT213_shelx
;
PROBLEM: Atom C12C          has ADP max/min Ratio .....    4.5 prolat
RESPONSE: ...
;
_vrf_PLAT234_shelx
;
PROBLEM: Large Hirshfeld Difference C27D    --C28D    .    0.28 Ang.
RESPONSE: ...
;
_vrf_PLAT342_shelx
;
PROBLEM: Low Bond Precision on  C-C Bonds .....    0.02123 Ang.
RESPONSE: ...
;
_vrf_PLAT410_shelx
;
PROBLEM: Short Intra H...H Contact  H44G    ..H50D    .    1.88 Ang.
RESPONSE: ...
;
# end Validation Reply Form
```

---

It is advisable to attempt to resolve as many as possible of the alerts in all categories. Often the minor alerts point to easily fixed oversights, errors and omissions in your CIF or refinement strategy, so attention to these fine details can be worthwhile. In order to resolve some of the more serious problems it may be necessary to carry out additional measurements or structure refinements. However, the purpose of your study may justify the reported deviations and the more serious of these should normally be commented upon in the discussion or experimental section of a paper or in the "special\_details" fields of the CIF. checkCIF was carefully designed to identify outliers and unusual parameters, but every test has its limitations and alerts that are not important in a particular case may appear. Conversely, the absence of alerts does not guarantee there are no aspects of the results needing attention. It is up to the individual to critically assess their own results and, if necessary, seek expert advice.

### **Publication of your CIF in IUCr journals**

A basic structural check has been run on your CIF. These basic checks will be run on all CIFs submitted for publication in IUCr journals (*Acta Crystallographica*, *Journal of Applied Crystallography*, *Journal of Synchrotron Radiation*); however, if you intend to submit to *Acta Crystallographica Section C* or *E* or *IUCrData*, you should make sure that full publication checks are run on the final version of your CIF prior to submission.

### **Publication of your CIF in other journals**

Please refer to the *Notes for Authors* of the relevant journal for any special instructions relating to CIF submission.

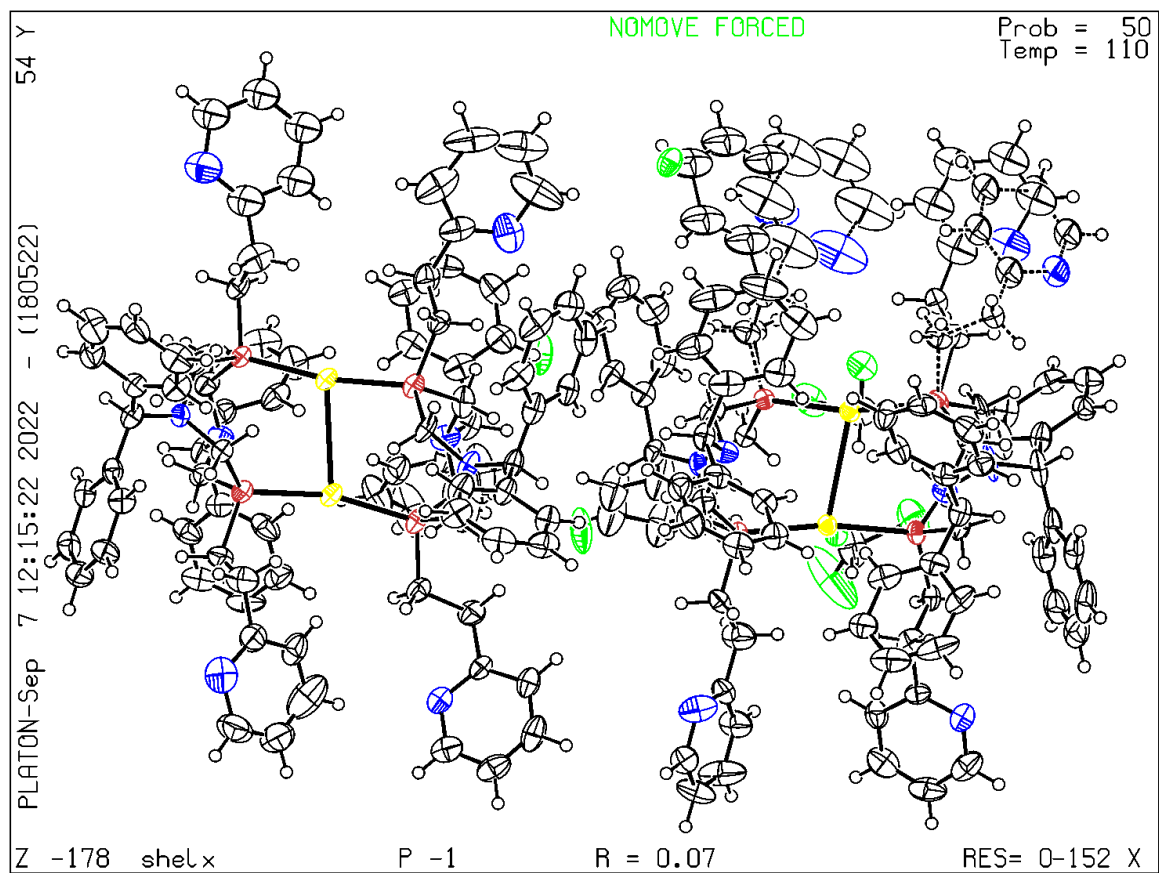

Supplement: s1 [file s1]
