# Supplementary material for: Aurophilic Interactions of Dimeric Bisphosphine Gold(I) Complexes Pre-Organized by the Structure of the 1,5-Diaza-3,7-Diphosphacyclooctanes
Source: MDPI journal article supplement (doi:10.3390/inorganics10120224), 2022-11-25

## checkCIF/PLATON report

Structure factors have been supplied for datablock(s) kar201\_corr

THIS REPORT IS FOR GUIDANCE ONLY. IF USED AS PART OF A REVIEW PROCEDURE FOR PUBLICATION, IT SHOULD NOT REPLACE THE EXPERTISE OF AN EXPERIENCED CRYSTALLOGRAPHIC REFEREE.

No syntax errors found.      CIF dictionary      Interpreting this report

### Datablock: kar201\_corr

---

Bond precision:      C-C = 0.0064 Å      Wavelength=1.54184

Cell:                  a=15.7816(3)                  b=16.8956(4)                  c=17.5198(4)  
                         alpha=73.294(2)                  beta=67.489(2)                  gamma=84.5748(17)  
Temperature:      100 K

|                        | Calculated           | Reported              |
|------------------------|----------------------|-----------------------|
| Volume                 | 4132.75(17)          | 4132.76(17)           |
| Space group            | P -1                 | P -1                  |
| Hall group             | -P 1                 | -P 1                  |
| Moiety formula         | C88 H92 Au2 I2 N8 P4 | 2(C44 H46 Au I N4 P2) |
| Sum formula            | C88 H92 Au2 I2 N8 P4 | C88 H92 Au2 I2 N8 P4  |
| Mr                     | 2033.32              | 2033.30               |
| Dx, g cm <sup>-3</sup> | 1.634                | 1.634                 |
| Z                      | 2                    | 2                     |
| Mu (mm <sup>-1</sup> ) | 13.554               | 13.554                |
| F000                   | 2000.0               | 2000.0                |
| F000'                  | 1987.62              |                       |
| h, k, lmax             | 19, 21, 22           | 19, 21, 22            |
| Nref                   | 17417                | 16836                 |
| Tmin, Tmax             | 0.246, 0.763         | 0.312, 0.898          |
| Tmin'                  | 0.137                |                       |

Correction method= # Reported T Limits: Tmin=0.312 Tmax=0.898  
AbsCorr = GAUSSIAN

Data completeness= 0.967      Theta(max)= 76.731

|                                |                   |
|--------------------------------|-------------------|
| R(reflections)= 0.0394( 15034) | wR2(reflections)= |
| S = 1.084                      | 0.1071( 16836)    |
| Npar= 1205                     |                   |

---

The following ALERTS were generated. Each ALERT has the format

**test-name\_ALERT\_alert-type\_alert-level.**

Click on the hyperlinks for more details of the test.

---

### ● Alert level C

|                   |                                                 |              |
|-------------------|-------------------------------------------------|--------------|
| PLAT042_ALERT_1_C | Calc. and Reported MoietyFormula Strings Differ | Please Check |
| PLAT213_ALERT_2_C | Atom C1V has ADP max/min Ratio .....            | 3.4 prolat   |
| PLAT220_ALERT_2_C | NonSolvent Resd 1 C Ueq(max)/Ueq(min) Range     | 4.2 Ratio    |
| PLAT220_ALERT_2_C | NonSolvent Resd 1 N Ueq(max)/Ueq(min) Range     | 3.1 Ratio    |
| PLAT222_ALERT_3_C | NonSolvent Resd 1 H Uiso(max)/Uiso(min) Range   | 4.3 Ratio    |
| PLAT241_ALERT_2_C | High 'MainMol' Ueq as Compared to Neighbors of  | N1Q Check    |
| PLAT241_ALERT_2_C | High 'MainMol' Ueq as Compared to Neighbors of  | C1T Check    |
| PLAT241_ALERT_2_C | High 'MainMol' Ueq as Compared to Neighbors of  | C1V Check    |
| PLAT241_ALERT_2_C | High 'MainMol' Ueq as Compared to Neighbors of  | C1W Check    |
| PLAT241_ALERT_2_C | High 'MainMol' Ueq as Compared to Neighbors of  | C3Q Check    |
| PLAT242_ALERT_2_C | Low 'MainMol' Ueq as Compared to Neighbors of   | C1C Check    |
| PLAT242_ALERT_2_C | Low 'MainMol' Ueq as Compared to Neighbors of   | C1S Check    |
| PLAT906_ALERT_3_C | Large K Value in the Analysis of Variance ..... | 2.808 Check  |
| PLAT911_ALERT_3_C | Missing FCF Refl Between Thmin & STh/L= 0.600   | 16 Report    |
| PLAT971_ALERT_2_C | Check Calcd Resid. Dens. 3.01Ang From C3K       | 2.11 eA-3    |
| PLAT971_ALERT_2_C | Check Calcd Resid. Dens. 0.95Ang From I1        | 1.88 eA-3    |
| PLAT971_ALERT_2_C | Check Calcd Resid. Dens. 2.76Ang From C2V       | 1.58 eA-3    |
| PLAT973_ALERT_2_C | Check Calcd Positive Resid. Density on Aul      | 1.30 eA-3    |
| PLAT977_ALERT_2_C | Check Negative Difference Density on H1E .      | -0.31 eA-3   |

---

### ● Alert level G

|                   |                                                  |             |
|-------------------|--------------------------------------------------|-------------|
| PLAT002_ALERT_2_G | Number of Distance or Angle Restraints on AtSite | 36 Note     |
| PLAT083_ALERT_2_G | SHELXL Second Parameter in WGHT Unusually Large  | 10.72 Why ? |
| PLAT171_ALERT_4_G | The CIF-Embedded .res File Contains EADP Records | 3 Report    |
| PLAT176_ALERT_4_G | The CIF-Embedded .res File Contains SADI Records | 15 Report   |
| PLAT187_ALERT_4_G | The CIF-Embedded .res File Contains RIGU Records | 2 Report    |
| PLAT300_ALERT_4_G | Atom Site Occupancy of N2N Constrained at        | 0.5 Check   |
| PLAT300_ALERT_4_G | Atom Site Occupancy of N23 Constrained at        | 0.5 Check   |
| PLAT300_ALERT_4_G | Atom Site Occupancy of C1A Constrained at        | 0.5 Check   |
| PLAT300_ALERT_4_G | Atom Site Occupancy of C1N Constrained at        | 0.5 Check   |
| PLAT300_ALERT_4_G | Atom Site Occupancy of C2A Constrained at        | 0.5 Check   |
| PLAT300_ALERT_4_G | Atom Site Occupancy of C2B Constrained at        | 0.5 Check   |
| PLAT300_ALERT_4_G | Atom Site Occupancy of C2C Constrained at        | 0.5 Check   |
| PLAT300_ALERT_4_G | Atom Site Occupancy of C2E Constrained at        | 0.5 Check   |
| PLAT300_ALERT_4_G | Atom Site Occupancy of C2F Constrained at        | 0.5 Check   |
| PLAT300_ALERT_4_G | Atom Site Occupancy of C2H Constrained at        | 0.5 Check   |
| PLAT300_ALERT_4_G | Atom Site Occupancy of C2J Constrained at        | 0.5 Check   |
| PLAT300_ALERT_4_G | Atom Site Occupancy of C2K Constrained at        | 0.5 Check   |
| PLAT300_ALERT_4_G | Atom Site Occupancy of C2L Constrained at        | 0.5 Check   |
| PLAT300_ALERT_4_G | Atom Site Occupancy of C2O Constrained at        | 0.5 Check   |
| PLAT300_ALERT_4_G | Atom Site Occupancy of C2P Constrained at        | 0.5 Check   |
| PLAT300_ALERT_4_G | Atom Site Occupancy of C2U Constrained at        | 0.5 Check   |
| PLAT300_ALERT_4_G | Atom Site Occupancy of C2V Constrained at        | 0.5 Check   |
| PLAT300_ALERT_4_G | Atom Site Occupancy of C2W Constrained at        | 0.5 Check   |
| PLAT300_ALERT_4_G | Atom Site Occupancy of C2X Constrained at        | 0.5 Check   |
| PLAT300_ALERT_4_G | Atom Site Occupancy of C2Y Constrained at        | 0.5 Check   |
| PLAT300_ALERT_4_G | Atom Site Occupancy of C2Z Constrained at        | 0.5 Check   |
| PLAT300_ALERT_4_G | Atom Site Occupancy of C3D Constrained at        | 0.5 Check   |
| PLAT300_ALERT_4_G | Atom Site Occupancy of C3E Constrained at        | 0.5 Check   |

[illegible]

[illegible]

|                   |                                                  |                |           |          |
|-------------------|--------------------------------------------------|----------------|-----------|----------|
| PLAT300_ALERT_4_G | Atom Site Occupancy of H21                       | Constrained at | 0.5       | Check    |
| PLAT300_ALERT_4_G | Atom Site Occupancy of H29                       | Constrained at | 0.5       | Check    |
| PLAT300_ALERT_4_G | Atom Site Occupancy of H31                       | Constrained at | 0.5       | Check    |
| PLAT300_ALERT_4_G | Atom Site Occupancy of H34                       | Constrained at | 0.5       | Check    |
| PLAT300_ALERT_4_G | Atom Site Occupancy of H39                       | Constrained at | 0.5       | Check    |
| PLAT300_ALERT_4_G | Atom Site Occupancy of H45                       | Constrained at | 0.5       | Check    |
| PLAT300_ALERT_4_G | Atom Site Occupancy of H46                       | Constrained at | 0.5       | Check    |
| PLAT300_ALERT_4_G | Atom Site Occupancy of H47A                      | Constrained at | 0.5       | Check    |
| PLAT300_ALERT_4_G | Atom Site Occupancy of H47B                      | Constrained at | 0.5       | Check    |
| PLAT300_ALERT_4_G | Atom Site Occupancy of H48A                      | Constrained at | 0.5       | Check    |
| PLAT300_ALERT_4_G | Atom Site Occupancy of H48B                      | Constrained at | 0.5       | Check    |
| PLAT301_ALERT_3_G | Main Residue Disorder .....(Resd 1 )             |                | 48%       | Note     |
| PLAT302_ALERT_4_G | Anion/Solvent/Minor-Residue Disorder (Resd 2 )   |                | 40%       | Note     |
| PLAT410_ALERT_2_G | Short Intra H...H Contact H1N ..H1TB .           |                | 1.81 Ang. |          |
|                   | x,y,z =                                          | 1_555          | Check     |          |
| PLAT410_ALERT_2_G | Short Intra H...H Contact H1TB ..H2BA .          |                | 2.13 Ang. |          |
|                   | x,y,z =                                          | 1_555          | Check     |          |
| PLAT410_ALERT_2_G | Short Intra H...H Contact H1VA ..H24B .          |                | 2.13 Ang. |          |
|                   | x,y,z =                                          | 1_555          | Check     |          |
| PLAT410_ALERT_2_G | Short Intra H...H Contact H1VA ..H28 .           |                | 2.14 Ang. |          |
|                   | x,y,z =                                          | 1_555          | Check     |          |
| PLAT410_ALERT_2_G | Short Intra H...H Contact H1B ..H3A .            |                | 2.06 Ang. |          |
|                   | x,y,z =                                          | 1_555          | Check     |          |
| PLAT720_ALERT_4_G | Number of Unusual/Non-Standard Labels .....      |                | 16        | Note     |
| PLAT779_ALERT_4_G | Suspect or Irrelevant (Bond) Angle(s) in CIF ... |                | 9.36 Deg. |          |
|                   | AU2 -P4 -AU2A 2_656 1_555 2_656 .....            | #              | 40        | Check    |
| PLAT789_ALERT_4_G | Atoms with Negative _atom_site_disorder_group #  |                | 28        | Check    |
| PLAT790_ALERT_4_G | Centre of Gravity not Within Unit Cell: Resd. #  |                | 2         | Note     |
|                   | C88 H92 Au2 I2 N8 P4                             |                |           |          |
| PLAT793_ALERT_4_G | Model has Chirality at C                         | (Centro SPGR)  |           | S Verify |
| PLAT793_ALERT_4_G | Model has Chirality at C5                        | (Centro SPGR)  |           | R Verify |
| PLAT793_ALERT_4_G | Model has Chirality at C20                       | (Centro SPGR)  |           | R Verify |
| PLAT811_ALERT_5_G | No ADDSYM Analysis: Too Many Excluded Atoms .... |                |           | ! Info   |
| PLAT860_ALERT_3_G | Number of Least-Squares Restraints .....         |                | 57        | Note     |
| PLAT912_ALERT_4_G | Missing # of FCF Reflections Above STh/L= 0.600  |                | 565       | Note     |
| PLAT933_ALERT_2_G | Number of HKL-OMIT Records in Embedded .res File |                | 13        | Note     |
| PLAT941_ALERT_3_G | Average HKL Measurement Multiplicity .....       |                | 3.3       | Low      |
| PLAT978_ALERT_2_G | Number C-C Bonds with Positive Residual Density. |                | 0         | Info     |

---

0 **ALERT level A** = Most likely a serious problem - resolve or explain  
 0 **ALERT level B** = A potentially serious problem, consider carefully  
 19 **ALERT level C** = Check. Ensure it is not caused by an omission or oversight  
 173 **ALERT level G** = General information/check it is not something unexpected

1 ALERT type 1 CIF construction/syntax error, inconsistent or missing data  
 24 ALERT type 2 Indicator that the structure model may be wrong or deficient  
 6 ALERT type 3 Indicator that the structure quality may be low  
 160 ALERT type 4 Improvement, methodology, query or suggestion  
 1 ALERT type 5 Informative message, check

---

It is advisable to attempt to resolve as many as possible of the alerts in all categories. Often the minor alerts point to easily fixed oversights, errors and omissions in your CIF or refinement strategy, so attention to these fine details can be worthwhile. In order to resolve some of the more serious problems it may be necessary to carry out additional measurements or structure refinements. However, the purpose of your study may justify the reported deviations and the more serious of these should normally be commented upon in the discussion or experimental section of a paper or in the "special\_details" fields of the CIF. checkCIF was carefully designed to identify outliers and unusual parameters, but every test has its limitations and alerts that are not important in a particular case may appear. Conversely, the absence of alerts does not guarantee there are no aspects of the results needing attention. It is up to the individual to critically assess their own results and, if necessary, seek expert advice.

### **Publication of your CIF in IUCr journals**

A basic structural check has been run on your CIF. These basic checks will be run on all CIFs submitted for publication in IUCr journals (*Acta Crystallographica*, *Journal of Applied Crystallography*, *Journal of Synchrotron Radiation*); however, if you intend to submit to *Acta Crystallographica Section C* or *E* or *IUCrData*, you should make sure that full publication checks are run on the final version of your CIF prior to submission.

### **Publication of your CIF in other journals**

Please refer to the *Notes for Authors* of the relevant journal for any special instructions relating to CIF submission.

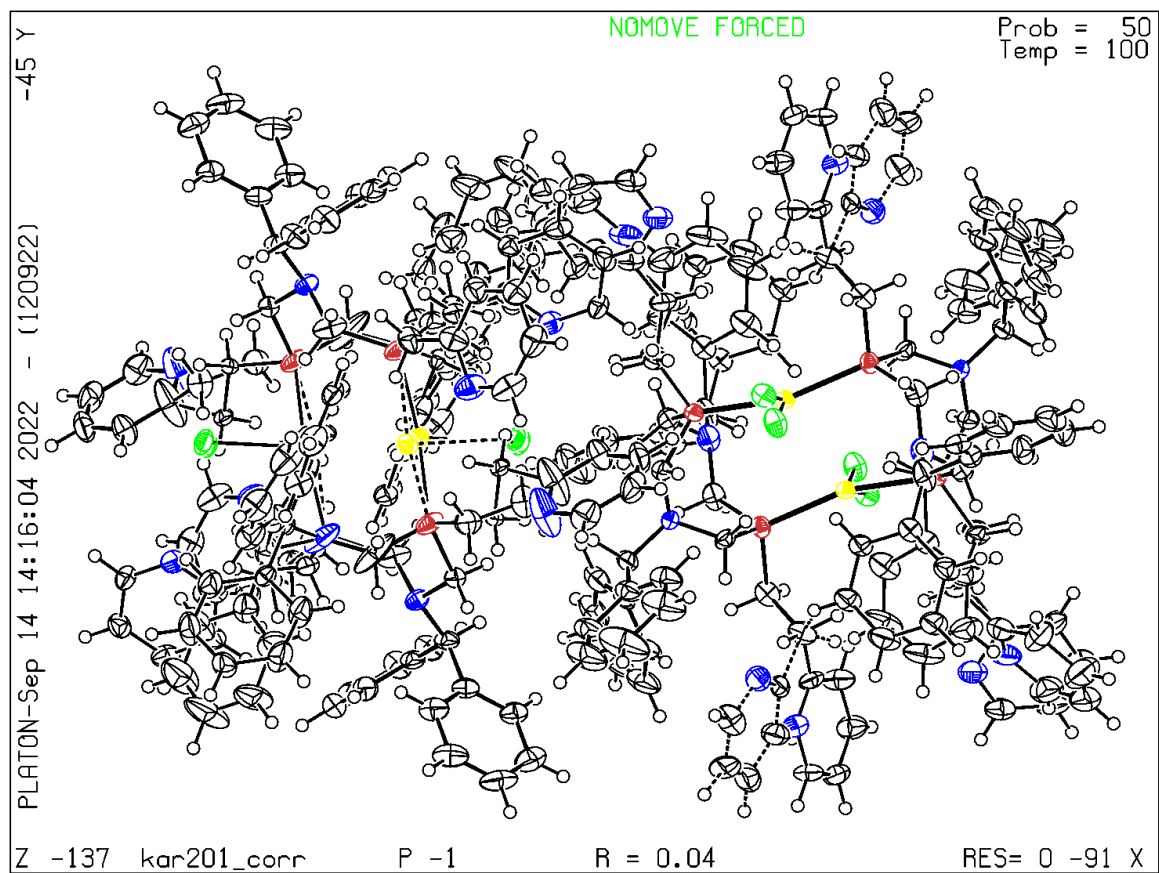

Supplement: s1 [file s1]
