# Supplementary material for: Aurophilic Interactions of Dimeric Bisphosphine Gold(I) Complexes Pre-Organized by the Structure of the 1,5-Diaza-3,7-Diphosphacyclooctanes
Source: MDPI journal article supplement (doi:10.3390/inorganics10120224), 2022-11-25
Supplement: s1 [file s1]

## Aurophilic interactions of dimeric bisphosphine gold(I) complexes pre-organized by the structure of the 1,5-diaza-3,7-diphosphacyclooctanes

Irina R. Dayanova,<sup>1</sup> Adelina Fayezeva,<sup>1</sup> Igor D. Strel'nik,<sup>1</sup> Igor A. Litvinov,<sup>1</sup> Daut R. Islamov,<sup>1</sup> Ilya E. Kolesnikov,<sup>2</sup> Tatiana P. Gerasimova,<sup>1</sup> Elvira I. Musina,<sup>1\*</sup> Andrey A. Karasik<sup>1</sup>

<sup>1</sup> Arbuzov Institute of Organic and Physical Chemistry, FRC Kazan Scientific Center, Russian Academy of Sciences, 8 Arbuzov Street, 420088 Kazan, Russia

<sup>2</sup> Center for Optical and Laser Materials Research, Saint Petersburg State University, 7/9 Universitetskaya nab., 1990345 St. Petersburg, Russia

\* Correspondence: elli@iopc.ru

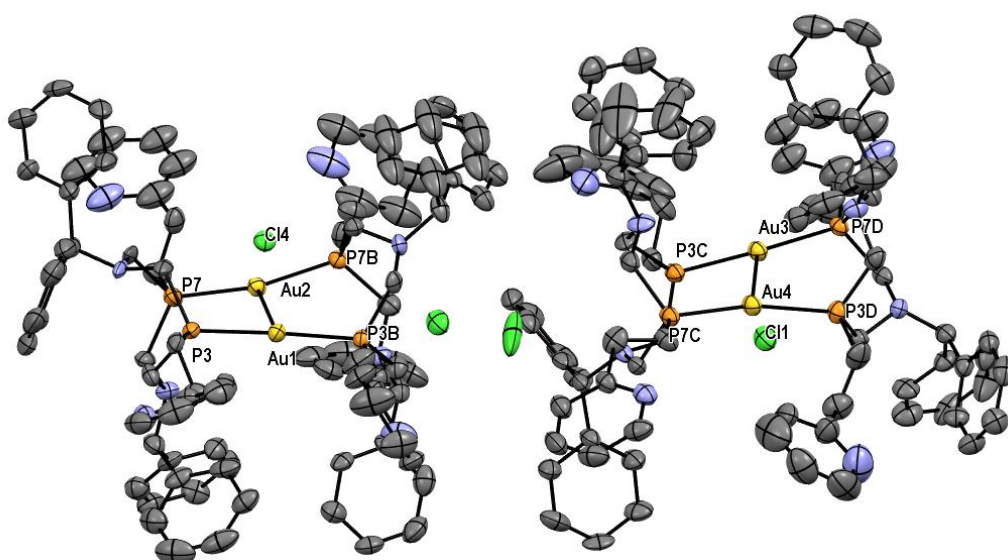

Figure S1. Unit cell of crystal of complex 2

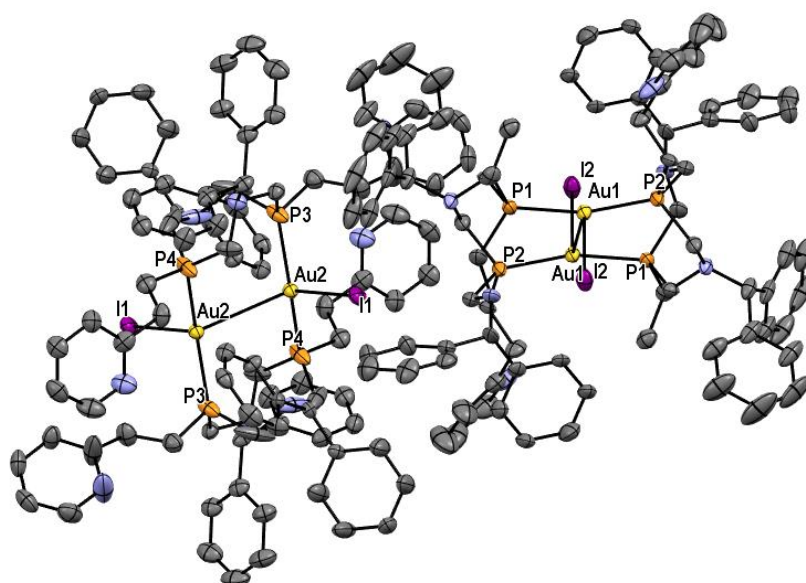

Figure S2. Unit cell of crystal of complex 3

**Table S1.** Selected structural parameters of complexes **2** and **3**

|           | Molecule A                  |       |              |           |  | Molecule B |       |              |          |  |
|-----------|-----------------------------|-------|--------------|-----------|--|------------|-------|--------------|----------|--|
| Complex 2 | Bonds lengths and distances |       |              |           |  |            |       |              |          |  |
|           | Atom1                       | Atom2 | Distance (Å) |           |  | Atom1      | Atom2 | Distance (Å) |          |  |
|           | Au1                         | Au2   | 2.9977(6)    |           |  | Au3        | Au4   | 2.9870(6)    |          |  |
|           | Au1                         | P3    | 2.316(3)     |           |  | Au3        | P3C   | 2.311(3)     |          |  |
|           | Au1                         | P3B   | 2.298(3)     |           |  | Au4        | P7C   | 2.304(3)     |          |  |
|           | Au2                         | P7    | 2.315(3)     |           |  | Au4        | P3D   | 2.317(3)     |          |  |
|           | Au2                         | P7B   | 2.315(3)     |           |  | Au3        | P7D   | 2.308(3)     |          |  |
|           | Au1                         | Cl4   | 3.036        |           |  | Au3        | Cl1   | 3.046        |          |  |
|           | Angles                      |       |              |           |  |            |       |              |          |  |
|           | P3                          | Au1   | P3B          | 169.4(1)  |  | P3C        | Au3   | P7D          | 169.2(1) |  |
|           | P7                          | Au2   | P7B          | 165.3(1)  |  | P7C        | Au4   | P3D          | 164.6(1) |  |
|           | Molecule A                  |       |              |           |  | Molecule B |       |              |          |  |
| Complex 3 | Bonds lengths and distances |       |              |           |  |            |       |              |          |  |
|           | Atom1                       | Atom2 | Distance (Å) |           |  | Atom1      | Atom2 | Distance (Å) |          |  |
|           | Au1                         | Au1   | 3.1680(5)    |           |  | Au2        | Au2   | 3.195(2)     |          |  |
|           | Au1                         | P1    | 2.297(1)     |           |  | Au2        | P3    | 2.395(4)     |          |  |
|           | Au1                         | P2    | 2.300(1)     |           |  | Au2        | P4    | 2.255(4)     |          |  |
|           | Au1                         | I2    | 3.168(1)     |           |  | Au2        | I1    | 3.002(4)     |          |  |
|           | Angles                      |       |              |           |  |            |       |              |          |  |
|           | P2                          | Au1   | P1           | 164.18(5) |  | P3         | Au2   | P4           | 157.0(1) |  |
|           | P1                          | Au1   | I2           | 94.65(4)  |  | P4         | Au2   | I1           | 101.1(1) |  |
|           | I2                          | Au1   | P2           | 91.31(4)  |  | P3         | Au2   | I1           | 96.6(1)  |  |
|           |                             |       |              |           |  | P4         | Au2   | I1A          | 100.1(1) |  |
|           |                             |       |              |           |  | I1A        | Au2   | P3           | 96.3(1)  |  |

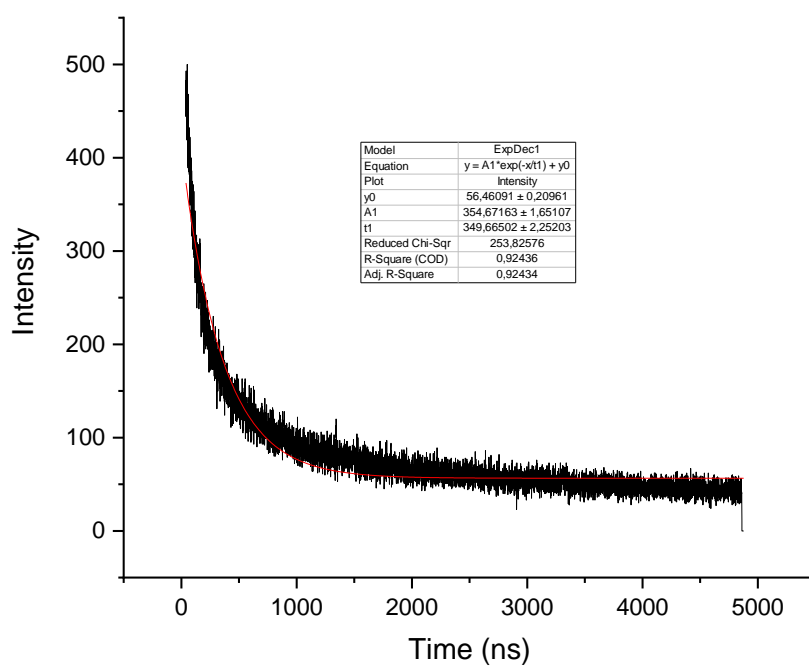

**Figure S3.** Luminescence decay curve of complex **2** measured for 505 nm emission band in solid state

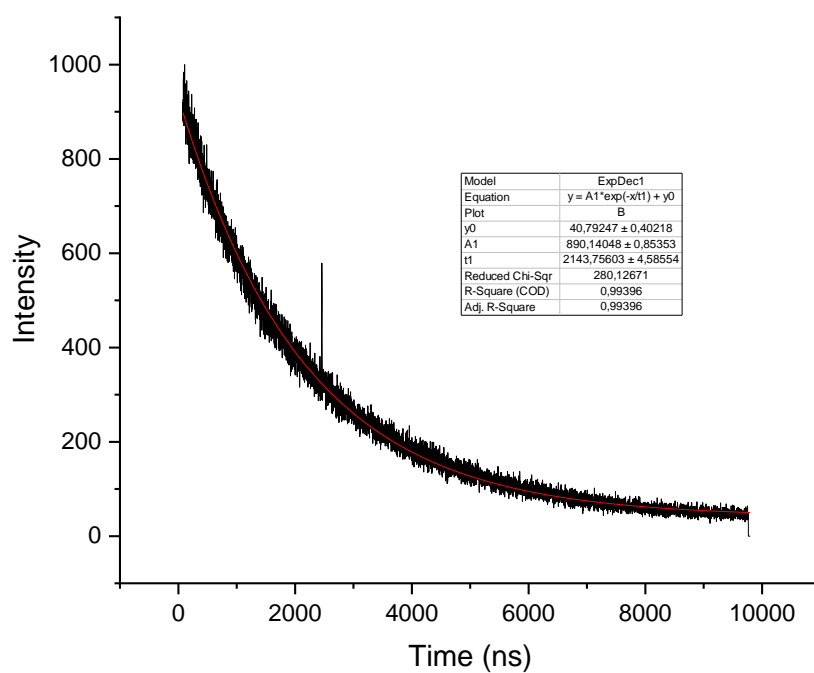

**Figure S4.** Luminescence decay curve of complex **3** measured for 530 nm emission band in solid state

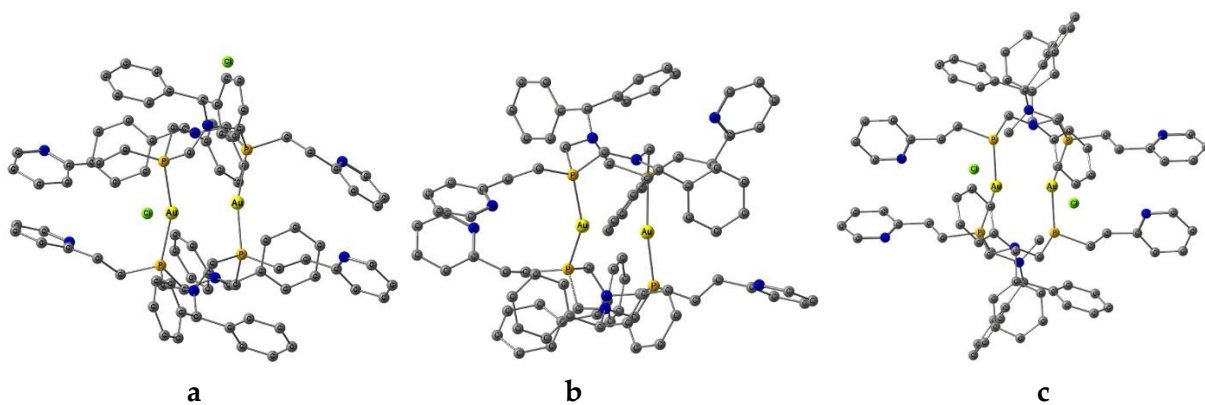

**Figure S5.** Optimized triplet structures of the singlet ground states ( $S_0$ ) of considered models **2** (a), **2a** (b) and **2b** (c) of complex **2**.

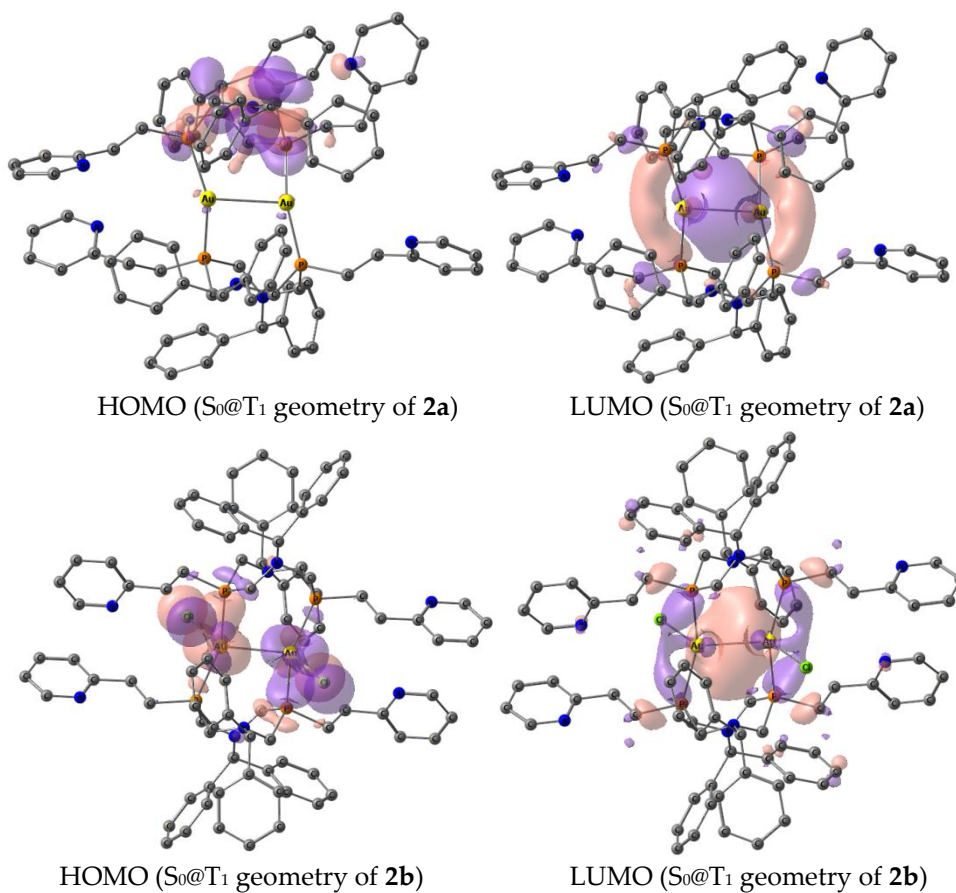

**Figure S6.** Frontier orbitals of the singlet ground states ( $S_0$ ) at the optimized  $T_1$  ( $S_0@T_1$ , bottom) geometries of quantum-chemically considered models i and iii of complex **2**.

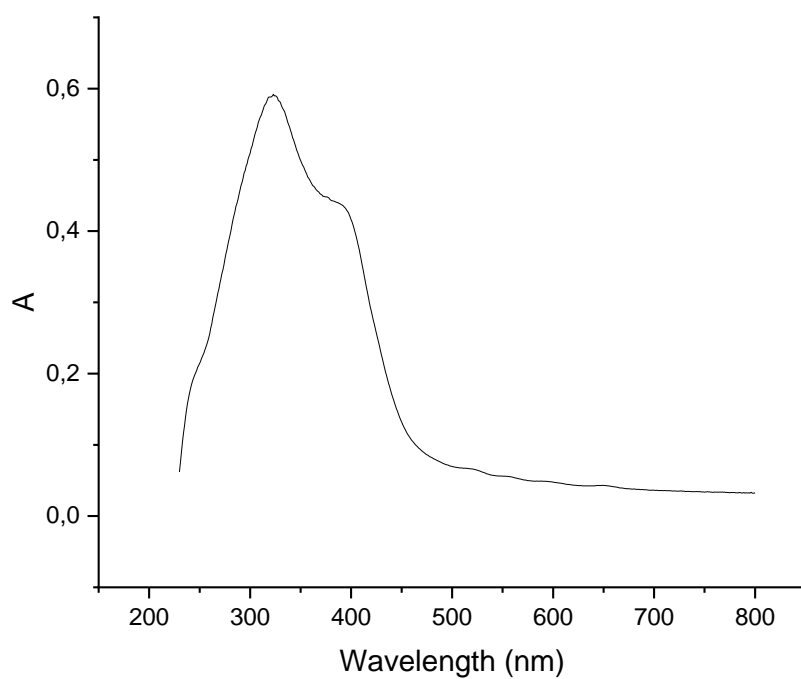

**Figure S7.** UV/Vis absorbance spectra of complex **2** measured in solid state

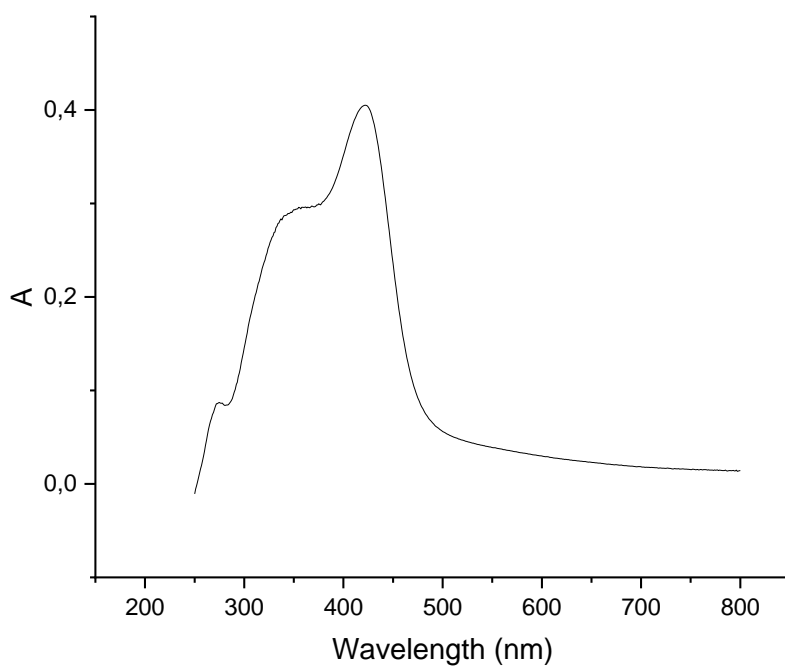

**Figure S8.** UV/Vis absorbance spectra of complex **3** measured in solid state
